# Supplementary material
Source: publisher site journal article supplement (https://www.dovepress.com/get_supplementary_file.php?f=467320.docx)
Supplement: Supplementary file 1 [file get_supplementary_file.php]

**Supplemental Files**

# Table S1. Characteristics of the participants stratified by serine concentration quartiles

| Variables | Serine, μg/mL | | | | *P* value |
| --- | --- | --- | --- | --- | --- |
| Q1  (<10.62) | Q2  (10.62-<13.41) | Q3  (13.41-<16.27) | Q4  (≥16.27) |
| N | 214 | 214 | 214 | 214 |  |
| Male, n (%) | 102 (47.66%) | 94 (43.93%) | 100 (46.73%) | 104 (48.60%) | 0.789 |
| Age, years | 62.33 ± 11.01 | 64.14 ± 10.22 | 63.57 ± 10.21 | 63.87 ± 10.04 | 0.281 |
| BMI, kg/m2 | 25.86 ± 3.58 | 26.19 ± 3.66 | 26.39 ± 4.00 | 25.86 ± 3.49 | 0.364 |
| SBP, mm Hg | 132.92 ± 15.23 | 132.18 ± 15.35 | 136.12 ± 17.61 | 131.33 ± 16.66 | 0.015 |
| LDL-C, mmol/L | 2.35 ± 0.85 | 2.37 ± 0.88 | 2.29 ± 0.77 | 2.32 ± 0.76 | 0.765 |
| FPG, mmol/L | 7.06 ± 3.18 | 6.95 ± 2.98 | 7.16 ± 3.25 | 6.88 ± 2.76 | 0.812 |
| Crea, μmol/L | 77.40 (65.60-89.80) | 74.44  (65.80-85.87) | 75.60 (64.58-87.78) | 74.15  (63.31-84.46) | 0.132 |
| Smoking, n (%) |  |  |  |  | 0.399 |
| Never | 120 (56.34%) | 124 (58.22%) | 135 (63.98%) | 120 (57.14%) |  |
| Ever | 38 (17.84%) | 47 (22.07%) | 33 (15.64%) | 39 (18.57%) |  |
| Current | 55 (25.82%) | 42 (19.72%) | 43 (20.38%) | 51 (24.29%) |  |
| Drinking, n (%) |  |  |  |  | 0.043 |
| Never | 148 (69.48%) | 146 (68.54%) | 156 (74.64%) | 139 (66.51%) |  |
| Ever | 24 (11.27%) | 27 (12.68%) | 18 (8.61%) | 13 (6.22%) |  |
| Current | 41 (19.25%) | 40 (18.78%) | 35 (16.75%) | 57 (27.27%) |  |
| Comorbidities, n (%) |  |  |  |  |  |
| Hypertension | 148 (69.16%) | 151 (70.56%) | 158 (73.83%) | 142 (66.36%) | 0.399 |
| Diabetes | 81 (37.85%) | 97 (45.33%) | 88 (41.12%) | 94 (43.93%) | 0.411 |
| Hyperlipidemia | 170 (79.44%) | 168 (78.50%) | 165 (77.10%) | 165 (77.10%) | 0.921 |
| Medications, n (%) |  |  |  |  |  |
| Anti-hypertensive | 115 (53.74%) | 122 (57.01%) | 128 (59.81%) | 110 (51.40%) | 0.316 |
| Hypoglycemic | 58 (27.10%) | 70 (32.71%) | 67 (31.31%) | 68 (31.78%) | 0.602 |
| Lipid-lowering | 101 (47.20%) | 107 (50.00%) | 108 (50.47%) | 94 (43.93%) | 0.505 |

For continuous variables, the data are presented as the mean ± standard deviation or median (interquartile range) depending on the distribution.

BMI, body mass index; CHD, coronary heart disease; Crea, plasma creatinine; FPG, fasting plasma glucose; LDL-C, low-density lipoprotein cholesterol; SBP, systolic blood pressure.

# Table S2. Characteristics of the participants stratified by sex

| Variables | Males | Females | *P* value |
| --- | --- | --- | --- |
| N | 400 | 456 |  |
| Age, years | 60.08 ± 11.41 | 66.46 ± 8.32 | <0.001 |
| BMI, kg/m2 | 26.16 ± 3.40 | 26.00 ± 3.93 | 0.536 |
| SBP, mm Hg | 131.91 ± 15.82 | 134.23 ± 16.69 | 0.040 |
| LDL-C, mmol/L | 2.27 ± 0.78 | 2.39 ± 0.84 | 0.030 |
| FPG, mmol/L | 6.64 ± 2.50 | 7.33 ± 3.41 | 0.001 |
| Crea, μmol/L | 83.50 (76.00-94.90) | 66.41 (59.97-76.18) | <0.001 |
| Smoking status, n (%) |  |  | <0.001 |
| Never | 96 (24.24%) | 403 (89.36%) |  |
| Ever | 143 (36.11%) | 14 (3.10%) |  |
| Current | 157 (39.65%) | 34 (7.54%) |  |
| Drinking status, n (%) |  |  | <0.001 |
| Never | 163 (41.48%) | 426 (94.46%) |  |
| Ever | 76 (19.34%) | 6 (1.33%) |  |
| Current | 154 (39.19%) | 19 (4.21%) |  |
| Comorbidities, n (%) |  |  |  |
| Hypertension | 266 (66.50%) | 333 (73.03%) | 0.038 |
| Diabetes | 148 (37.00%) | 212 (46.49%) | 0.005 |
| Hyperlipidemia | 314 (78.50%) | 354 (77.63%) | 0.759 |
| Medications, n (%) |  |  |  |
| Anti-hypertensive | 205 (51.25%) | 270 (59.21%) | 0.019 |
| Hypoglycemic | 104 (26.00%) | 159 (34.87%) | 0.005 |
| Lipid-lowering | 177 (44.25%) | 233 (51.10%) | 0.045 |
| Serine, μg/mL | 13.58 ± 4.06 | 13.54 ± 4.21 | 0.866 |

For continuous variables, the data are presented as the mean ± standard deviation or median (interquartile range) depending on the distribution.

BMI, body mass index; CHD, coronary heart disease; Crea, plasma creatinine; FPG, fasting plasma glucose; LDL-C, low-density lipoprotein cholesterol; SBP, systolic blood pressure.

# Table S3. Association of the serine concentration with CHD risk modified by smoking status

| Variables | Never smoking* | | Ever or current smoking* | | *P* for interaction |
| --- | --- | --- | --- | --- | --- |
| OR (95% CI) | *P* value | OR (95% CI) | *P* value |
| Serine, per 1 μg/mL | 1.00 (0.95, 1.05) | 0.957 | 0.93 (0.87, 0.99) | 0.017 | 0.054 |
| Quartiles, μg/mL |  |  |  |  | 0.023 |
| Q1 (<10.62) | Ref |  |  |  |  |
| Q2 (10.62-13.41) | 1.40 (0.79, 2.48) | 0.253 | 0.68 (0.34, 1.37) | 0.283 |  |
| Q3 (13.41-16.27) | 0.66 (0.37, 1.17) | 0.155 | 0.93 (0.45, 1.94) | 0.843 |  |
| Q4 (≥16.27) | 1.13 (0.64, 2.02) | 0.668 | 0.45 (0.22, 0.92) | 0.028 |  |
| *P* for trend |  | 0.651 |  | 0.065 |  |

*The logistic regression models were adjusted for age, sex, BMI, SBP, FPG, LDL-C, Crea, smoking status, drinking status, hypertension, diabetes mellitus, hyperlipidemia, anti-hypertensive treatment, hypoglycemic treatment, and lipid-lowering treatment.

BMI, body mass index; CHD, coronary heart disease; CI, confidence interval; Crea, plasma creatinine; FPG, fasting plasma glucose; LDL-C, low-density lipoprotein cholesterol; OR, odds ratio; SBP, systolic blood pressure.

# Table S4. Association of the serine concentration with CHD risk after further adjusting for glycine

| Variables | Cases (%) | Model 3 | |
| --- | --- | --- | --- |
| OR (95% CI) | *P* value |
| Serine, per 1 μg/mL | 428(50.0) | 0.90 (0.84, 0.97) | 0.003 |
| Quartiles, μg/mL |  |  |  |
| Q1 (<10.62) | 115 (53.74) | Ref |  |
| Q2 (10.62-13.41) | 116 (54.21) | 0.82 (0.47, 1.44) | 0.495 |
| Q3 (13.41-16.27) | 97 (45.33) | 0.46 (0.25, 0.84) | 0.012 |
| Q4 (≥16.27) | 100 (46.73) | 0.40 (0.20, 0.82) | 0.012 |
| *P* for trend |  |  | 0.004 |
| Groups, μg/mL |  |  |  |
| <13.41 (Q1 + Q2) | 229 (54.52%) | Ref |  |
| ≥13.41 (Q3 + Q4) | 199 (45.64%) | 0.50 (0.31, 0.79) | 0.003 |

Conditional logistic regression Model 3 was conditioned on the matching factors of age, sex, and operation time, and adjusted for BMI, SBP, FPG, LDL-C, Crea, smoking status, drinking status, hypertension, diabetes mellitus, hyperlipidemia, anti-hypertensive treatment, hypoglycemic treatment, lipid-lowering treatment, and glycine.

BMI, body mass index; CHD, coronary heart disease; CI, confidence interval; Crea, plasma creatinine; FPG, fasting plasma glucose; LDL-C, low-density lipoprotein cholesterol; OR, odds ratio; SBP, systolic blood pressure.

# Table S5. Association of the serine concentration with CHD risk after further adjusting for other related nutrients

| Variables | Cases (%) | Model 4 | |
| --- | --- | --- | --- |
| OR (95% CI) | *P* value |
| Serine, per 1 μg/mL | 428(50.0) | 0.93 (0.87, 0.98) | 0.013 |
| Quartiles, μg/mL |  |  |  |
| Q1 (<10.62) | 115 (53.74) | Ref |  |
| Q2 (10.62-13.41) | 116 (54.21) | 0.84 (0.47, 1.50) | 0.547 |
| Q3 (13.41-16.27) | 97 (45.33) | 0.49 (0.27, 0.90) | 0.021 |
| Q4 (≥16.27) | 100 (46.73) | 0.48 (0.25, 0.94) | 0.033 |
| *P* for trend |  |  | 0.011 |
| Groups, μg/mL |  |  |  |
| <13.41 (Q1 + Q2) | 229 (54.52%) | Ref |  |
| ≥13.41 (Q3 + Q4) | 199 (45.64%) | 0.55 (0.35, 0.84) | 0.007 |

Conditional logistic regression Model 4 was conditioned on the matching factors of age, sex, and operation time, and adjusted for BMI, SBP, FPG, LDL-C, Crea, smoking status, drinking status, hypertension, diabetes mellitus, hyperlipidemia, anti-hypertensive treatment, hypoglycemic treatment, lipid-lowering treatment, homocysteine, methionine, vitamin B6 and B12, and white blood cell count.

BMI, body mass index; CHD, coronary heart disease; CI, confidence interval; Crea, plasma creatinine; FPG, fasting plasma glucose; LDL-C, low-density lipoprotein cholesterol; OR, odds ratio; SBP, systolic blood pressure.

# Table S6. Association of the serine concentration with CHD risk after further adjusting for tumor and depression

| Variables | Cases (%) | Model 5 | |
| --- | --- | --- | --- |
| OR (95% CI) | *P* value |
| Serine, per 1 μg/mL | 428(50.0) | 0.94 (0.89, 0.99) | 0.011 |
| Quartiles, μg/mL |  |  |  |
| Q1 (<10.62) | 115 (53.74) | Ref |  |
| Q2 (10.62-13.41) | 116 (54.21) | 0.91 (0.54, 1.55) | 0.731 |
| Q3 (13.41-16.27) | 97 (45.33) | 0.55 (0.32, 0.94) | 0.029 |
| Q4 (≥16.27) | 100 (46.73) | 0.54 (0.31, 0.94) | 0.029 |
| *P* for trend |  |  | 0.008 |
| Groups, μg/mL |  |  |  |
| <13.41 (Q1 + Q2) | 229 (54.52%) | Ref |  |
| ≥13.41 (Q3 + Q4) | 199 (45.64%) | 0.57 (0.39, 0.84) | 0.005 |

Conditional logistic regression Model 5 was conditioned on the matching factors of age, sex, and operation time, and adjusted for BMI, SBP, FPG, LDL-C, Crea, smoking status, drinking status, hypertension, diabetes mellitus, hyperlipidemia, anti-hypertensive treatment, hypoglycemic treatment, lipid-lowering treatment, tumor, and depression.

BMI, body mass index; CHD, coronary heart disease; CI, confidence interval; Crea, plasma creatinine; FPG, fasting plasma glucose; LDL-C, low-density lipoprotein cholesterol; OR, odds ratio; SBP, systolic blood pressure.
